# Supplementary material for: Social Factors, Sex, and Mortality Risk After Coronary Artery Bypass Grafting: A Population‐Based Cohort Study
Source: PubMed Central journal article supplement — J Am Heart Assoc. 2019 Mar 11;8(6):e011490. doi: 10.1161/JAHA.118.011490 (PMC6475039; doi:10.1161/jaha.118.011490), 2019-03-11
Supplement: JAH3-8-e011490-s001.pdf [file JAH3-8-e011490-s001.pdf]

# **SUPPLEMENTAL MATERIAL**

**Table S1. Baseline characteristic in 110,742 patients who underwent coronary artery bypass grafting in Sweden during 1992–2015 by sex and age groups.**

|                             | Total        | Men                  | Women               |                |
|-----------------------------|--------------|----------------------|---------------------|----------------|
| <b>Age group 18–54</b>      | <b>12967</b> | <b>10928 (84.3%)</b> | <b>2039 (15.7%)</b> |                |
| Mean age, years (SD)        | 49.5 (4.2)   | 49.6 (4.1)           | 49.1 (4.6)          |                |
|                             | <b>n (%)</b> | <b>n (%)</b>         | <b>n (%)</b>        | <b>p-value</b> |
| Myocardial infarction       | 5930 (45.7)  | 5064 (46.3)          | 866 (42.5)          | 0.0014         |
| Diabetes                    | 2474 (19.1)  | 1837 (16.8)          | 637 (31.2)          | <.0001         |
| Hypertension                | 3356 (25.9)  | 2695 (24.7)          | 661 (32.4)          | <.0001         |
| Heart failure               | 1001 (7.7)   | 788 (7.2)            | 213 (10.4)          | <.0001         |
| Atrial fibrillation         | 205 (1.6)    | 183 (1.7)            | 22 (1.2)            | 0.051          |
| Stroke                      | 256 (2.0)    | 215 (2.0)            | 41 (2.0)            | 0.95           |
| Chronic respiratory disease | 346 (2.7)    | 247 (2.3)            | 99 (4.9)            | <.0001         |
| Peripheral vascular disease | 394 (3.0)    | 291 (2.7)            | 103 (5.1)           | <.0001         |
| Renal insufficiency         | 279 (2.2)    | 180 (1.7)            | 99 (4.9)            | <.0001         |
| Congenital heart disease    | 19 (0.1)     | 13 (0.1)             | 6 (0.3)             | 0.13           |
| Malignancy                  | 217 (1.7)    | 152 (1.4)            | 65 (3.2)            | <.0001         |
| <b>Marital status</b>       |              |                      |                     |                |
| Married/cohabiting          | 7393 (57.0)  | 6288 (57.5)          | 1105 (54.2)         |                |
| Not married                 | 2966 (22.9)  | 2568 (23.5)          | 398 (19.5)          |                |
| Divorced                    | 2472 (19.1)  | 1997 (18.3)          | 475 (23.3)          |                |
| Widowed                     | 136 (1.0)    | 75 (0.7)             | 61 (3.0)            | <.0001         |
| <b>Education</b>            |              |                      |                     |                |
| <10 years                   | 4283 (33.0)  | 3646 (33.4)          | 637 (31.2)          |                |
| 10-12 years                 | 6297 (48.6)  | 5217 (47.7)          | 1082 (53.0)         |                |
| >12 years                   | 2387 (18.4)  | 2065 (18.9)          | 322 (15.8)          | 0.56           |
| <b>Income</b>               |              |                      |                     |                |
| Q1 (lowest)                 | 1964 (15.1)  | 1601 (14.7)          | 363 (17.8)          |                |
| Q2                          | 1892 (14.6)  | 1551 (14.2)          | 341 (16.7)          |                |
| Q3                          | 1742 (13.4)  | 1458 (13.3)          | 284 (13.9)          |                |
| Q4                          | 3160 (24.4)  | 2671 (24.4)          | 489 (24.0)          |                |
| Q5                          | 4209(32.5)   | 3647 (33.4)          | 562 (27.6)          | <.0001         |
| <b>Age group 55–64</b>      | <b>30486</b> | <b>25520 (83.7%)</b> | <b>4966 (16.3%)</b> |                |
| Mean age, years (SD)        | 60.0 (2.8)   | 60.0 (2.8)           | 60.2 (2.8)          | <.0001         |
|                             | <b>n (%)</b> | <b>n (%)</b>         | <b>n (%)</b>        | <b>p-value</b> |

|                             |              |                      |                      |                |
|-----------------------------|--------------|----------------------|----------------------|----------------|
| Myocardial infarction       | 13652 (44.8) | 11496 (45.0)         | 2156 (43.4)          | 0.036          |
| Diabetes                    | 6307 (20.7)  | 4908 (19.2)          | 1399 (28.2)          | <.0001         |
| Hypertension                | 9764 (32.0)  | 7904 (31.0)          | 1860 (37.5)          | <.0001         |
| Heart failure               | 2826 (9.3)   | 2307 (9.0)           | 519 (10.5)           | 0.0021         |
| Atrial fibrillation         | 1147 (3.8)   | 1031 (4.0)           | 116 (2.3)            | <.0001         |
| Stroke                      | 1092 (3.6)   | 912 (3.6)            | 180 (3.6)            | 0.89           |
| Chronic respiratory disease | 1226 (4.0)   | 907 (3.6)            | 319 (6.4)            | <.0001         |
| Peripheral vascular disease | 1467 (4.8)   | 1151 (4.5)           | 316 (6.4)            | <.0001         |
| Renal insufficiency         | 444 (1.5)    | 355 (1.4)            | 89 (1.8)             | 0.040          |
| Congenital heart disease    | 33 (0.1)     | 29 (0.1)             | 4 (0.1)              | 0.71           |
| Malignancy                  | 1100 (3.6)   | 859 (3.4)            | 241 (4.9)            | <.0001         |
| <b>Marital status</b>       |              |                      |                      |                |
| Married/cohabiting          | 19917 (65.3) | 17021 (66.7)         | 2896 (58.3)          |                |
| Not married                 | 3664 (12.0)  | 3220 (12.6)          | 444 (8.9)            |                |
| Divorced                    | 5791 (19.0)  | 4654 (18.2)          | 1137 (22.9)          |                |
| Widowed                     | 1114 (3.7)   | 625 (2.4)            | 489 (9.8)            | <.0001         |
| <b>Education</b>            |              |                      |                      |                |
| <10 years                   | 12796 (42.0) | 10582 (41.5)         | 2214 (44.6)          |                |
| 10-12 years                 | 12290 (40.3) | 10249 (40.2)         | 2041 (41.1)          |                |
| >12 years                   | 5400 (17.7)  | 4689 (18.4)          | 711 (14.3)           | <.0001         |
| <b>Income</b>               |              |                      |                      |                |
| Q1 (lowest)                 | 4358 (14.3)  | 3266 (12.8)          | 1092 (22.0)          |                |
| Q2                          | 4341 (14.2)  | 3455 (13.5)          | 886 (17.8)           |                |
| Q3                          | 4941 (16.2)  | 3999 (15.7)          | 942 (19.0)           |                |
| Q4                          | 7603 (24.9)  | 6542 (25.6)          | 1061 (21.4)          |                |
| Q5                          | 9243 (30.3)  | 8258 (32.4)          | 985 (19.8)           | <.0001         |
| <hr/>                       |              |                      |                      |                |
| <b>Age group 65–74</b>      | <b>44413</b> | <b>34378 (77.4%)</b> | <b>10035 (22.6%)</b> |                |
| Mean, age, years (SD)       | 69.6 (2.8)   | 69.5 (2.8)           | 69.9 (2.8)           |                |
|                             | <b>n (%)</b> | <b>n (%)</b>         | <b>n (%)</b>         | <b>p-value</b> |
| Myocardial infarction       | 21106 (47.5) | 16339 (47.5)         | 4767 (47.8)          | 0.98           |
| Diabetes                    | 9009 (20.3)  | 6624 (19.3)          | 2385 (23.8)          | <.0001         |
| Hypertension                | 15634 (35.2) | 11626 (33.8)         | 4008 (39.9)          | <.0001         |
| Heart failure               | 5527 (12.4)  | 4202 (12.2)          | 1325 (13.2)          | 0.0096         |
| Atrial fibrillation         | 3383 (7.6)   | 2795 (8.1)           | 588 (5.9)            | <.0001         |
| Stroke                      | 2392 (5.4)   | 1898 (5.5)           | 494 (4.9)            | 0.020          |
| Chronic respiratory disease | 2214 (5.0)   | 1597 (4.6)           | 617 (6.1)            | <.0001         |

|                             |              |                      |                     |                |
|-----------------------------|--------------|----------------------|---------------------|----------------|
| Peripheral vascular disease | 3126 (7.0)   | 2333 (6.8)           | 793 (7.9)           | 0.0002         |
| Renal insufficiency         | 721 (1.6)    | 563 (1.6)            | 158 (1.6)           | 0.70           |
| Congenital heart disease    | 48 (0.1)     | 37 (0.1)             | 11 (0.1)            | 1.00           |
| Malignancy                  | 3436 (7.7)   | 2723 (7.9)           | 713 (7.1)           | 0.0071         |
| <b>Marital status</b>       |              |                      |                     |                |
| Married/cohabiting          | 30470 (68.6) | 25069 (72.9)         | 5401 (53.8)         |                |
| Not married                 | 3143 (7.1)   | 2681 (7.8)           | 462 (4.6)           |                |
| Divorced                    | 5941 (13.4)  | 4304 (12.5)          | 1637 (16.3)         |                |
| Widowed                     | 4859 (10.9)  | 2324 (6.8)           | 2535 (25.3)         | <.0001         |
| <b>Education</b>            |              |                      |                     |                |
| <10 years                   | 23198 (52.2) | 17196 (50.0)         | 6002 (59.8)         |                |
| 10-12 years                 | 15075 (33.9) | 11955 (34.8)         | 3120 (31.1)         |                |
| >12 years                   | 6140 (13.8)  | 5227 (15.2)          | 913 (9.1)           | <.0001         |
| <b>Income</b>               |              |                      |                     |                |
| Q1 (lowest)                 | 9267 (20.9)  | 5509 (16.0)          | 3758 (37.4)         |                |
| Q2                          | 9617 (21.7)  | 7308 (21.3)          | 2309 (23.0)         |                |
| Q3                          | 10291 (23.2) | 8257 (24.0)          | 2034 (20.3)         |                |
| Q4                          | 8383 (18.9)  | 7185 (20.9)          | 1198 (11.9)         |                |
| Q5                          | 6855 (15.4)  | 6119 (17.8)          | 736 (7.3)           | <.0001         |
| <b>Age group 75+</b>        | <b>22876</b> | <b>16280 (71.2%)</b> | <b>6596 (28.8%)</b> |                |
| Mean age, years (SD)        | 78.0 (2.7)   | 78.0 (2.7)           | 78.1 (2.6)          |                |
|                             | <b>n (%)</b> | <b>n (%)</b>         | <b>n (%)</b>        | <b>p-value</b> |
| Myocardial infarction       | 12256 (53.6) | 8550 (52.5)          | 3706 (56.2)         | <.0001         |
| Diabetes                    | 4273 (18.7)  | 2895 (17.8)          | 1378 (20.9)         | <.0001         |
| Hypertension                | 9140 (40.0)  | 6056 (37.2)          | 3084 (46.8)         | <.0001         |
| Heart failure               | 4016 (17.6)  | 2783 (17.1)          | 1233 (18.7)         | 0.0044         |
| Atrial fibrillation         | 2880 (12.6)  | 2163 (13.3)          | 717 (10.9)          | <.0001         |
| Stroke                      | 1610 (7.0)   | 1189 (7.3)           | 421 (6.4)           | 0.014          |
| Chronic respiratory disease | 1386 (6.1)   | 943 (5.8)            | 443 (6.8)           | 0.0093         |
| Peripheral vascular disease | 1888 (8.3)   | 1329 (8.2)           | 559 (8.5)           | 0.45           |
| Renal insufficiency         | 479 (2.1)    | 375 (2.3)            | 104 (1.6)           | 0.0004         |
| Congenital heart disease    | 22 (0.1)     | 18 (0.1)             | 4 (0.1)             | 0.39           |
| Malignancy                  | 2981 (13.0)  | 2307 (14.2)          | 674 (10.2)          | <.0001         |
| <b>Marital status</b>       |              |                      |                     |                |
| Married/cohabiting          | 14168 (61.9) | 11655 (71.6)         | 2513 (38.1)         |                |
| Not married                 | 1162 (5.1)   | 892 (5.5)            | 270 (4.1)           |                |

|                  |              |             |              |        |
|------------------|--------------|-------------|--------------|--------|
| Divorced         | 2041 (8.9)   | 1307 (8.0)  | 734 (11.1)   |        |
| Widowed          | 5505 (24.1)  | 2426 (14.9) | 3079 (46.7%) | <.0001 |
| <b>Education</b> |              |             |              |        |
| <10 years        | 13135 (57.4) | 8817 (54.2) | 4318 (65.5)  |        |
| 10-12 years      | 7071 (30.9)  | 5308 (32.6) | 1763 (26.7)  |        |
| >12 years        | 2670 (11.7)  | 2155 (13.2) | 515 (7.8)    | <.0001 |
| <b>Income</b>    |              |             |              |        |
| Q1 (lowest)      | 6555 (28.7)  | 3092 (19.0) | 3463 (52.5)  |        |
| Q2               | 6303 (27.6)  | 4875 (29.9) | 1428 (21.6)  |        |
| Q3               | 5174 (22.6)  | 4237 (26.0) | 937 (14.2)   |        |
| Q4               | 3003 (13.1)  | 2511 (15.4) | 492 (7.5)    |        |
| Q5               | 1841 (8.0)   | 1565 (9.6)  | 276 (4.2)    | <.0001 |

---

**Table S2. Interactions between age categories and social factors in 110,742 patients who underwent coronary artery bypass grafting in Sweden during 1992–2015.**

|          |            | p-value for interaction between age categories and social factors |                          |                             |                               |
|----------|------------|-------------------------------------------------------------------|--------------------------|-----------------------------|-------------------------------|
| Subgroup | No at risk | Social factors                                                    | Model 1<br>Age-adjusted* | Model 2<br>Multi adjusted † | Model 3<br>Multi adjusted HR‡ |
| Male     | 87106      | Marital status                                                    | <.0001                   | <.0001                      | <.0001                        |
|          |            | Education                                                         | 0.041                    | 0.081                       | 0.077                         |
|          |            | Income                                                            | <.0001                   | <.0001                      | <.0001                        |
| Female   | 23636      | Marital status                                                    | 0.0026                   | 0.018                       | 0.14                          |
|          |            | Education                                                         | 0.34                     | 0.19                        | 0.26                          |
|          |            | Income                                                            | 0.0074                   | 0.037                       | 0.074                         |

\*Model 1, age-adjusted. † Model 2, adjusted for age, sex, year of surgery, comorbidities (previous myocardial infarction, diabetes, hypertension, heart failure, atrial fibrillation, stroke, chronic respiratory disease, peripheral vascular disease, renal insufficiency, malignancy, and congenital heart disease), ‡, Model 3, adjusted for model 2 and social factors other than the main effect variable.

**Table S3. Age adjusted and multi-adjusted hazard ratios for all-cause mortality in 110,742 patients who underwent coronary artery bypass grafting in Sweden during 1992–2015.**

|                       | Men        |             |                           |                             |                             | Women      |             |                           |                             |                             | p-value § | p-value | p-value # |
|-----------------------|------------|-------------|---------------------------|-----------------------------|-----------------------------|------------|-------------|---------------------------|-----------------------------|-----------------------------|-----------|---------|-----------|
|                       | No at risk | No of death | Age-adjusted HR* (95% CI) | Multi adjusted HR† (95% CI) | Multi adjusted HR‡ (95% CI) | No at risk | No of death | Age-adjusted HR* (95% CI) | Multi adjusted HR† (95% CI) | Multi adjusted HR‡ (95% CI) |           |         |           |
| <b>All ages</b>       |            |             |                           |                             |                             |            |             |                           |                             |                             |           |         |           |
| <b>Marital status</b> |            |             |                           |                             |                             |            |             |                           |                             |                             |           |         |           |
| Married/ cohabiting   | 60033      | 27238       | 1.00                      | 1.00                        | 1.00                        | 11915      | 5586        | 1.00                      | 1.00                        | 1.00                        | 0.014     | 0.057   | 0.030     |
| Not married           | 9361       | 3609        | 1.40 (1.35-1.45)          | 1.38 (1.33-1.43)            | 1.17 (1.13-1.22)            | 1574       | 667         | 1.37 (1.26-1.49)          | 1.36 (1.26-1.48)            | 1.32 (1.20-1.44)            |           |         |           |
| Divorced              | 12262      | 4946        | 1.32 (1.28-1.36)          | 1.30 (1.26-1.34)            | 1.13 (1.09-1.17)            | 3983       | 1785        | 1.25 (1.19-1.32)          | 1.21 (1.15-1.28)            | 1.13 (1.06-1.22)            |           |         |           |
| Widowed               | 5450       | 3406        | 1.22 (1.17-1.26)          | 1.19 (1.15-1.23)            | 1.06 (1.02-1.10)            | 6164       | 3820        | 1.17 (1.12-1.23)          | 1.16 (1.11-1.21)            | 1.09 (1.03-1.16)            |           |         |           |
|                       |            |             |                           |                             |                             |            |             |                           |                             |                             |           |         |           |
| <b>Education</b>      |            |             |                           |                             |                             |            |             |                           |                             |                             |           |         |           |
| >12 years             | 14136      | 4711        | 1.00                      | 1.00                        | 1.00                        | 2461       | 817         | 1.00                      | 1.00                        | 1.00                        | 0.95      | 0.55    | 0.75      |
| 10-12 years           | 32729      | 13300       | 1.20 (1.16-1.24)          | 1.16 (1.12-1.20)            | 1.09 (1.05-1.13)            | 8004       | 3342        | 1.20 (1.11-1.30)          | 1.18 (1.09-1.27)            | 1.14 (1.06-1.24)            |           |         |           |
| <10 years             | 40241      | 21187       | 1.34 (1.30-1.38)          | 1.28 (1.24-1.32)            | 1.15 (1.11-1.19)            | 13171      | 7699        | 1.36 (1.27-1.46)          | 1.29 (1.20-1.39)            | 1.25 (1.16-1.35)            |           |         |           |
| <b>Income</b>         |            |             |                           |                             |                             |            |             |                           |                             |                             |           |         |           |
| Q5                    | 19589      | 4878        | 1.00                      | 1.00                        | 1.00                        | 2559       | 653         | 1.00                      | 1.00                        | 1.00                        | <.0001    | <.0001  | 0.0036    |
| Q4                    | 18909      | 7373        | 1.18 (1.14-1.22)          | 1.15 (1.11-1.20)            | 1.13 (1.09-1.17)            | 3240       | 1168        | 1.10 (1.00-1.21)          | 1.07 (0.97-1.17)            | 1.05 (0.95-1.15)            |           |         |           |
| Q3                    | 17951      | 9216        | 1.35 (1.30-1.40)          | 1.29 (1.25-1.34)            | 1.24 (1.19-1.28)            | 4197       | 1999        | 1.24 (1.14-1.36)          | 1.23 (1.13-1.34)            | 1.18 (1.08-1.29)            |           |         |           |
| Q2                    | 17189      | 10196       | 1.55 (1.50-1.61)          | 1.46 (1.41-1.51)            | 1.35 (1.30-1.41)            | 4964       | 2842        | 1.42 (1.30-1.55)          | 1.33 (1.22-1.45)            | 1.24 (1.14-1.36)            |           |         |           |
| Q1 (lowest)           | 13468      | 7535        | 1.79 (1.73-1.86)          | 1.66 (1.60-1.72)            | 1.44 (1.38-1.51)            | 8676       | 5196        | 1.56 (1.43-1.69)          | 1.45 (1.34-1.58)            | 1.25 (1.14-1.38)            |           |         |           |
|                       |            |             |                           |                             |                             |            |             |                           |                             |                             |           |         |           |
| <b>18–54 y</b>        |            |             |                           |                             |                             |            |             |                           |                             |                             |           |         |           |
| <b>Marital status</b> |            |             |                           |                             |                             |            |             |                           |                             |                             |           |         |           |
| Married/ cohabiting   | 6288       | 1318        | 1.00                      | 1.00                        | 1.00                        | 1105       | 269         | 1.00                      | 1.00                        | 1.00                        | 0.50      | 0.64    | 0.71      |

|                  |      |      |                  |                  |                  |      |     |                  |                  |                  |       |      |      |
|------------------|------|------|------------------|------------------|------------------|------|-----|------------------|------------------|------------------|-------|------|------|
| Not married      | 2568 | 658  | 1.71 (1.55-1.88) | 1.57 (1.43-1.73) | 1.27 (1.13-1.43) | 398  | 111 | 1.50 (1.20-1.87) | 1.34 (1.06-1.69) | 1.23 (0.94-1.61) |       |      |      |
| Divorced         | 1997 | 558  | 1.57 (1.42-1.73) | 1.50 (1.35-1.65) | 1.20 (1.06-1.36) | 475  | 133 | 1.30 (1.06-1.60) | 1.42 (1.15-1.76) | 1.29 (1.00-1.68) |       |      |      |
| Widowed          | 75   | 18   | 1.32 (0.83-2.11) | 1.36 (0.85-2.17) | 1.18 (0.74-1.89) | 61   | 20  | 1.31 (0.83-2.06) | 1.23 (0.78-1.94) | 1.14 (0.70-1.85) |       |      |      |
| <b>Education</b> |      |      |                  |                  |                  |      |     |                  |                  |                  |       |      |      |
| >12 years        | 2065 | 335  | 1.00             | 1.00             | 1.00             | 322  | 65  | 1.00             | 1.00             | 1.00             | 0.13  | 0.25 | 0.39 |
| 10-12 years      | 5217 | 1181 | 1.35 (1.19-1.52) | 1.29 (1.15-1.46) | 1.18 (1.04-1.33) | 1080 | 255 | 1.41 (1.07-1.87) | 1.41 (1.06-1.87) | 1.09 (0.83-1.44) |       |      |      |
| <10 years        | 3646 | 1036 | 1.45 (1.28-1.64) | 1.36 (1.20-1.54) | 1.22 (1.07-1.38) | 637  | 213 | 1.07 (0.82-1.41) | 1.13 (0.86-1.49) | 1.31 (0.98-1.75) |       |      |      |
| <b>Income</b>    |      |      |                  |                  |                  |      |     |                  |                  |                  |       |      |      |
| Q5               | 3647 | 553  | 1.00             | 1.00             | 1.00             | 562  | 89  | 1.00             | 1.00             | 1.00             | 0.083 | 0.14 | 0.12 |
| Q4               | 2671 | 662  | 1.32 (1.18-1.48) | 1.26 (1.12-1.41) | 1.20 (1.07-1.35) | 489  | 129 | 1.32 (1.01-1.73) | 1.28 (0.97-1.68) | 1.23 (0.93-1.62) |       |      |      |
| Q3               | 1458 | 359  | 1.54 (1.35-1.76) | 1.39 (1.22-1.59) | 1.27 (1.10-1.46) | 284  | 98  | 1.93 (1.45-2.57) | 1.69 (1.26-2.27) | 1.54 (1.14-2.08) |       |      |      |
| Q2               | 1551 | 443  | 1.79 (1.58-2.03) | 1.59 (1.40-1.80) | 1.34 (1.16-1.56) | 341  | 95  | 1.60 (1.20-2.14) | 1.52 (1.13-2.04) | 1.27 (0.91-1.78) |       |      |      |
| Q1 (lowest)      | 1601 | 605  | 2.43 (2.16-2.74) | 2.09 (1.86-2.36) | 1.71 (1.48-1.98) | 363  | 122 | 1.99 (1.52-2.62) | 1.74 (1.31-2.31) | 1.40 (1.00-1.97) |       |      |      |

---

**55–64 y**
**Marital status**

|                        |       |      |                  |                  |                  |      |     |                  |                  |                  |      |      |      |
|------------------------|-------|------|------------------|------------------|------------------|------|-----|------------------|------------------|------------------|------|------|------|
| Married/<br>cohabiting | 17021 | 5281 | 1.00             | 1.00             | 1.00             | 2896 | 928 | 1.00             | 1.00             | 1.00             | 0.48 | 0.27 | 0.18 |
| Not married            | 3220  | 1011 | 1.51 (1.41-1.61) | 1.41 (1.32-1.51) | 1.13 (1.04-1.22) | 444  | 136 | 1.62 (1.35-1.94) | 1.49 (1.24-1.79) | 1.36 (1.10-1.67) |      |      |      |
| Divorced               | 4654  | 1661 | 1.50 (1.42-1.59) | 1.45 (1.37-1.53) | 1.17 (1.09-1.25) | 1137 | 416 | 1.42 (1.26-1.59) | 1.35 (1.20-1.52) | 1.18 (1.01-1.38) |      |      |      |
| Widowed                | 625   | 270  | 1.47 (1.30-1.66) | 1.42 (1.26-1.61) | 1.18 (1.04-1.34) | 489  | 212 | 1.36 (1.17-1.58) | 1.24 (1.07-1.45) | 1.09 (0.92-1.28) |      |      |      |

**Education**

|             |       |      |                  |                  |                  |      |     |                  |                  |                  |      |      |       |
|-------------|-------|------|------------------|------------------|------------------|------|-----|------------------|------------------|------------------|------|------|-------|
| >12 years   | 4689  | 1106 | 1.00             | 1.00             | 1.00             | 711  | 153 | 1.00             | 1.00             | 1.00             | 0.15 | 0.26 | 0.085 |
| 10-12 years | 10249 | 3035 | 1.21 (1.13-1.30) | 1.17 (1.09-1.25) | 1.08 (1.01-1.16) | 2041 | 600 | 1.27 (1.07-1.52) | 1.23 (1.03-1.47) | 1.19 (1.00-1.43) |      |      |       |
| <10 years   | 10582 | 4082 | 1.37 (1.28-1.46) | 1.30 (1.22-1.39) | 1.14 (1.07-1.23) | 2214 | 939 | 1.58 (1.33-1.88) | 1.51 (1.27-1.79) | 1.45 (1.21-1.73) |      |      |       |

**Income**

|    |      |      |                  |                  |                  |      |     |                  |                  |                  |      |      |      |
|----|------|------|------------------|------------------|------------------|------|-----|------------------|------------------|------------------|------|------|------|
| Q5 | 8258 | 1646 | 1.00             | 1.00             | 1.00             | 985  | 194 | 1.00             | 1.00             | 1.00             | 0.51 | 0.38 | 0.38 |
| Q4 | 6542 | 2178 | 1.24 (1.17-1.33) | 1.21 (1.14-1.29) | 1.18 (1.11-1.26) | 1061 | 309 | 1.14 (0.96-1.37) | 1.08 (0.90-1.29) | 1.03 (0.85-1.23) |      |      |      |
| Q3 | 3999 | 1537 | 1.46 (1.36-1.56) | 1.39 (1.29-1.49) | 1.31 (1.22-1.41) | 942  | 347 | 1.29 (1.08-1.54) | 1.20 (1.00-1.44) | 1.11 (0.92-1.33) |      |      |      |



|                        |       |       |                  |                  |                  |      |      |                  |                  |                  |       |        |       |
|------------------------|-------|-------|------------------|------------------|------------------|------|------|------------------|------------------|------------------|-------|--------|-------|
| Q2                     | 3455  | 1441  | 1.80 (1.68-1.93) | 1.67 (1.56-1.79) | 1.49 (1.37-1.62) | 886  | 365  | 1.68 (1.41-2.00) | 1.53 (1.28-1.82) | 1.32 (1.09-1.59) |       |        |       |
| Q1 (lowest)            | 3266  | 1421  | 2.15 (2.00-2.30) | 1.87 (1.74-2.00) | 1.61 (1.47-1.76) | 1092 | 477  | 1.86 (1.57-2.20) | 1.61 (1.36-1.91) | 1.29 (1.05-1.60) |       |        |       |
| <b>65–74 y</b>         |       |       |                  |                  |                  |      |      |                  |                  |                  |       |        |       |
| <b>Marital status</b>  |       |       |                  |                  |                  |      |      |                  |                  |                  |       |        |       |
| Married/<br>cohabiting | 25069 | 13079 | 1.00             | 1.00             | 1.00             | 5401 | 2838 | 1.00             | 1.00             | 1.00             | 0.24  | 0.61   | 0.85  |
| Not married            | 2681  | 1361  | 1.32 (1.25-1.40) | 1.31 (1.24-1.39) | 1.13 (1.06-1.21) | 462  | 230  | 1.18 (1.03-1.35) | 1.20 (1.05-1.37) | 1.22 (1.05-1.42) |       |        |       |
| Divorced               | 4304  | 1992  | 1.26 (1.20-1.32) | 1.26 (1.20-1.32) | 1.12 (1.06-1.19) | 1637 | 824  | 1.26 (1.16-1.36) | 1.22 (1.13-1.32) | 1.20 (1.08-1.34) |       |        |       |
| Widowed                | 2324  | 1422  | 1.21 (1.15-1.28) | 1.20 (1.13-1.26) | 1.07 (1.01-1.14) | 2535 | 1555 | 1.16 (1.09-1.23) | 1.16 (1.09-1.23) | 1.13 (1.03-1.24) |       |        |       |
| <b>Education</b>       |       |       |                  |                  |                  |      |      |                  |                  |                  |       |        |       |
| >12 years              | 5227  | 2086  | 1.00             | 1.00             | 1.00             | 913  | 343  | 1.00             | 1.00             | 1.00             | 0.87  | 0.51   | 0.92  |
| 10-12 years            | 11955 | 5731  | 1.21 (1.15-1.27) | 1.15 (1.10-1.21) | 1.10 (1.04-1.15) | 3120 | 1470 | 1.21 (1.07-1.36) | 1.17 (1.04-1.32) | 1.15 (1.02-1.30) |       |        |       |
| <10 years              | 17196 | 10037 | 1.38 (1.32-1.45) | 1.31 (1.25-1.37) | 1.19 (1.14-1.25) | 6002 | 3634 | 1.37 (1.22-1.53) | 1.29 (1.16-1.45) | 1.28 (1.14-1.43) |       |        |       |
| <b>Income</b>          |       |       |                  |                  |                  |      |      |                  |                  |                  |       |        |       |
| Q5                     | 6119  | 1889  | 1.00             | 1.00             |                  | 736  | 248  | 1.00             | 1.00             |                  | 0.020 | 0.0044 | 0.026 |
| Q4                     | 7185  | 3219  | 1.15 (1.09-1.22) | 1.13 (1.06-1.19) | 1.10 (1.04-1.17) | 1198 | 475  | 0.98 (0.84-1.14) | 0.98 (0.84-1.14) | 0.97 (0.83-1.13) |       |        |       |
| Q3                     | 8257  | 4698  | 1.29 (1.22-1.36) | 1.23 (1.17-1.30) | 1.18 (1.11-1.24) | 2034 | 1044 | 1.16 (1.01-1.33) | 1.15 (1.00-1.32) | 1.12 (0.97-1.28) |       |        |       |
| Q2                     | 7308  | 4700  | 1.47 (1.39-1.55) | 1.37 (1.30-1.45) | 1.27 (1.20-1.35) | 2309 | 1425 | 1.25 (1.09-1.43) | 1.16 (1.02-1.33) | 1.09 (0.95-1.26) |       |        |       |
| Q1 (lowest)            | 5509  | 3338  | 1.69 (1.59-1.79) | 1.57 (1.49-1.66) | 1.36 (1.27-1.46) | 3758 | 2255 | 1.38 (1.21-1.58) | 1.30 (1.14-1.49) | 1.10 (0.94-1.28) |       |        |       |
| <b>&gt;75 y</b>        |       |       |                  |                  |                  |      |      |                  |                  |                  |       |        |       |
| <b>Marital status</b>  |       |       |                  |                  |                  |      |      |                  |                  |                  |       |        |       |
| Married/<br>cohabiting | 11655 | 7560  | 1.00             | 1.00             | 1.00             | 2513 | 1551 | 1.00             | 1.00             | 1.00             | 0.83  | 0.91   | 0.71  |
| Not married            | 892   | 579   | 1.16 (1.06-1.26) | 1.17 (1.08-1.28) | 1.07 (0.97-1.17) | 270  | 190  | 1.20 (1.03-1.39) | 1.21 (1.04-1.41) | 1.11 (0.93-1.31) |       |        |       |
| Divorced               | 1307  | 735   | 1.13 (1.05-1.22) | 1.12 (1.04-1.21) | 1.04 (0.96-1.14) | 734  | 412  | 1.11 (1.00-1.24) | 1.08 (0.97-1.20) | 0.97 (0.85-1.11) |       |        |       |
| Widowed                | 2426  | 1695  | 1.11 (1.06-1.17) | 1.09 (1.03-1.15) | 1.02 (0.96-1.09) | 3079 | 2033 | 1.08 (1.01-1.15) | 1.07 (1.00-1.14) | 0.96 (0.87-1.06) |       |        |       |
| <b>Education</b>       |       |       |                  |                  |                  |      |      |                  |                  |                  |       |        |       |
| >12 years              | 2155  | 1184  | 1.00             | 1.00             | 1.00             | 515  | 256  | 1.00             | 1.00             | 1.00             | 0.75  | 0.62   | 0.81  |

|               |      |      |                  |                  |                  |      |      |                  |                  |                  |      |      |      |
|---------------|------|------|------------------|------------------|------------------|------|------|------------------|------------------|------------------|------|------|------|
| 10-12 years   | 5308 | 3353 | 1.11 (1.04-1.19) | 1.10 (1.03-1.18) | 1.07 (1.00-1.15) | 1763 | 1017 | 1.18 (1.03-1.35) | 1.17 (1.02-1.34) | 1.10 (0.95-1.27) |      |      |      |
| <10 years     | 8817 | 6032 | 1.24 (1.16-1.32) | 1.21 (1.14-1.29) | 1.14 (1.07-1.22) | 4318 | 2913 | 1.30 (1.14-1.47) | 1.24 (1.09-1.40) | 1.15 (1.00-1.31) |      |      |      |
| <b>Income</b> |      |      |                  |                  |                  |      |      |                  |                  |                  |      |      |      |
| Q5            | 1565 | 780  | 1.00             | 1.00             | 1.00             | 276  | 122  | 1.00             | 1.00             | 1.00             | 0.31 | 0.25 | 0.20 |
| Q4            | 2511 | 1314 | 1.02 (0.94-1.12) | 1.02 (0.93-1.11) | 1.01 (0.92-1.10) | 492  | 255  | 1.24 (1.00-1.54) | 1.21 (0.97-1.50) | 1.20 (0.96-1.49) |      |      |      |
| Q3            | 4237 | 2622 | 1.10 (1.02-1.20) | 1.09 (1.01-1.18) | 1.06 (0.98-1.15) | 937  | 510  | 1.29 (1.06-1.57) | 1.35 (1.10-1.64) | 1.31 (1.07-1.60) |      |      |      |
| Q2            | 4875 | 3612 | 1.21 (1.12-1.30) | 1.17 (1.08-1.26) | 1.11 (1.02-1.20) | 1428 | 957  | 1.50 (1.24-1.81) | 1.49 (1.23-1.80) | 1.44 (1.19-1.75) |      |      |      |
| Q1 (lowest)   | 3092 | 2241 | 1.32 (1.21-1.43) | 1.27 (1.17-1.38) | 1.18 (1.07-1.30) | 3463 | 2342 | 1.57 (1.31-1.88) | 1.54 (1.28-1.85) | 1.52 (1.25-1.85) |      |      |      |

\*Hazard ratio (HR) adjusted for age. † Hazard ratio (HR) adjusted for age, sex, year of surgery, comorbidities listed in table 1, ‡, Hazard ratio (HR) adjusted for age, sex, year of surgery, comorbidities listed in table 1, and social factors other than the variable under study § p-value for interaction between sex in age adjusted model. || p-value for interaction between sex in multi-adjusted model, #,

**Table S4. Multi-adjusted for all-cause mortality in 110,742 patients who underwent coronary artery bypass grafting in Sweden during 1992–2015.**

|                        | No at risk | No of death | Men<br>Age-adjusted HR* (95% CI) | No at risk | No of death | Women<br>Age-adjusted HR* (95% CI) | p-value |
|------------------------|------------|-------------|----------------------------------|------------|-------------|------------------------------------|---------|
| <b>All ages</b>        |            |             |                                  |            |             |                                    |         |
| <b>Marital status</b>  |            |             |                                  |            |             |                                    |         |
| Married/<br>cohabiting | 60033      | 27238       | 1.00                             | 11915      | 5586        | 1.00                               | 0.0060  |
| Not married            | 9361       | 3609        | 1.15 (1.11 - 1.20)               | 1574       | 667         | 1.29 (1.18 - 1.42)                 |         |
| Divorced               | 12262      | 4946        | 1.11 (1.07 - 1.15)               | 3983       | 1785        | 1.14 (1.07 - 1.22)                 |         |
| Widowed                | 5450       | 3406        | 1.06 (1.01 - 1.10)               | 6164       | 3820        | 1.07 (1.01 - 1.13)                 |         |
| <b>Education</b>       |            |             |                                  |            |             |                                    |         |
| >12 years              | 14136      | 4711        | 1.00                             | 2461       | 817         | 1.00                               | 0.33    |
| 10-12 years            | 32729      | 13300       | 1.11 (1.07 - 1.15)               | 8004       | 3342        | 1.15 (1.07 - 1.25)                 |         |
| <10 years              | 40241      | 21187       | 1.17 (1.14 - 1.21)               | 13171      | 7699        | 1.30 (1.20 - 1.40)                 |         |
| <b>Income</b>          |            |             |                                  |            |             |                                    |         |
| Q5                     | 19589      | 4878        | 1.00                             | 2559       | 653         | 1.00                               | 0.0024  |
| Q4                     | 18909      | 7373        | 1.15 (1.11 - 1.19)               | 3240       | 1168        | 1.07 (0.97 - 1.18)                 |         |
| Q3                     | 17951      | 9216        | 1.29 (1.24 - 1.34)               | 4197       | 1999        | 1.19 (1.08 - 1.30)                 |         |
| Q2                     | 17189      | 10196       | 1.44 (1.39 - 1.50)               | 4964       | 2842        | 1.31 (1.20 - 1.44)                 |         |
| Q1 (lowest)            | 13468      | 7535        | 1.56 (1.49 - 1.63)               | 8676       | 5196        | 1.34 (1.22 - 1.48)                 |         |
| <b>18–54 y</b>         |            |             |                                  |            |             |                                    |         |
| <b>Marital status</b>  |            |             |                                  |            |             |                                    |         |
| Married/<br>cohabiting | 6288       | 1318        | 1.00                             | 1105       | 269         | 1.00                               | 0.56    |
| Not married            | 2568       | 658         | 1.30 (1.16 - 1.46)               | 398        | 111         | 1.27 (0.98 - 1.64)                 |         |
| Divorced               | 1997       | 558         | 1.17 (1.04 - 1.33)               | 475        | 133         | 1.08 (0.84 - 1.40)                 |         |
| Widowed                | 75         | 18          | 1.08 (0.68 - 1.72)               | 61         | 20          | 1.12 (0.69 - 1.80)                 |         |
| <b>Education</b>       |            |             |                                  |            |             |                                    |         |
| >12 years              | 2065       | 335         | 1.00                             | 322        | 65          | 1.00                               | 0.29    |
| 10-12 years            | 5217       | 1181        | 1.20 (1.06 - 1.36)               | 1080       | 255         | 1.01 (0.77 - 1.33)                 |         |
| <10 years              | 3646       | 1036        | 1.27 (1.12 - 1.44)               | 637        | 213         | 1.26 (0.95 - 1.67)                 |         |
| <b>Income</b>          |            |             |                                  |            |             |                                    |         |
| Q5                     | 3647       | 553         | 1.00                             | 562        | 89          | 1.00                               | 0.084   |
| Q4                     | 2671       | 662         | 1.26 (1.12 - 1.41)               | 489        | 129         | 1.28 (0.98 - 1.69)                 |         |
| Q3                     | 1458       | 359         | 1.40 (1.22 - 1.60)               | 284        | 98          | 1.81 (1.35 - 2.42)                 |         |
| Q2                     | 1551       | 443         | 1.50 (1.30 - 1.74)               | 341        | 95          | 1.43 (1.03 - 2.00)                 |         |
| Q1 (lowest)            | 1601       | 605         | 1.98 (1.71 - 2.29)               | 363        | 122         | 1.72 (1.24 - 2.39)                 |         |
| <b>55–64 y</b>         |            |             |                                  |            |             |                                    |         |
| <b>Marital status</b>  |            |             |                                  |            |             |                                    |         |

|                        |       |       |                    |      |      |                    |       |
|------------------------|-------|-------|--------------------|------|------|--------------------|-------|
| Married/<br>cohabiting | 17021 | 5281  | 1.00               | 2896 | 928  | 1.00               | 0.21  |
| Not married            | 3220  | 1011  | 1.13 (1.04 - 1.22) | 444  | 136  | 1.42 (1.16 - 1.74) |       |
| Divorced               | 4654  | 1661  | 1.14 (1.07 - 1.22) | 1137 | 416  | 1.18 (1.02 - 1.38) |       |
| Widowed                | 625   | 270   | 1.16 (1.02 - 1.32) | 489  | 212  | 1.14 (0.97 - 1.35) |       |
| <b>Education</b>       |       |       |                    |      |      |                    |       |
| >12 years              | 4689  | 1106  | 1.00               | 711  | 153  | 1.00               | 0.036 |
| 10-12 years            | 10249 | 3035  | 1.10 (1.03 - 1.18) | 2041 | 600  | 1.20 (1.01 - 1.44) |       |
| <10 years              | 10582 | 4082  | 1.17 (1.09 - 1.25) | 2214 | 939  | 1.48 (1.24 - 1.77) |       |
| <b>Income</b>          |       |       |                    |      |      |                    |       |
| Q5                     | 8258  | 1646  | 1.00               | 985  | 194  | 1.00               | 0.51  |
| Q4                     | 6542  | 2178  | 1.21 (1.13 - 1.29) | 1061 | 309  | 1.09 (0.91 - 1.31) |       |
| Q3                     | 3999  | 1537  | 1.37 (1.28 - 1.48) | 942  | 347  | 1.18 (0.99 - 1.42) |       |
| Q2                     | 3455  | 1441  | 1.61 (1.48 - 1.75) | 886  | 365  | 1.44 (1.19 - 1.74) |       |
| Q1 (lowest)            | 3266  | 1421  | 1.87 (1.71 - 2.04) | 1092 | 477  | 1.47 (1.20 - 1.81) |       |
| <hr/>                  |       |       |                    |      |      |                    |       |
| <b>65–74 y</b>         |       |       |                    |      |      |                    |       |
| <b>Marital status</b>  |       |       |                    |      |      |                    |       |
| Married/<br>cohabiting | 25069 | 13079 | 1.00               | 5401 | 2838 | 1.00               | 0.57  |
| Not married            | 2681  | 1361  | 1.10 (1.03 - 1.17) | 462  | 230  | 1.16 (1.00 - 1.35) |       |
| Divorced               | 4304  | 1992  | 1.10 (1.04 - 1.16) | 1637 | 824  | 1.19 (1.07 - 1.33) |       |
| Widowed                | 2324  | 1422  | 1.06 (0.99 - 1.12) | 2535 | 1555 | 1.08 (0.99 - 1.18) |       |
| <b>Education</b>       |       |       |                    |      |      |                    |       |
| >12 years              | 5227  | 2086  | 1.00               | 913  | 343  | 1.00               | 0.83  |
| 10-12 years            | 11955 | 5731  | 1.13 (1.08 - 1.19) | 3120 | 1470 | 1.17 (1.04 - 1.32) |       |
| <10 years              | 17196 | 10037 | 1.23 (1.17 - 1.29) | 6002 | 3634 | 1.32 (1.18 - 1.48) |       |
| <b>Income</b>          |       |       |                    |      |      |                    |       |
| Q5                     | 6119  | 1889  | 1.00               | 736  | 248  | 1.00               | 0.11  |
| Q4                     | 7185  | 3219  | 1.12 (1.06 - 1.19) | 1198 | 475  | 0.97 (0.83 - 1.13) |       |
| Q3                     | 8257  | 4698  | 1.23 (1.16 - 1.29) | 2034 | 1044 | 1.11 (0.96 - 1.27) |       |
| Q2                     | 7308  | 4700  | 1.36 (1.28 - 1.43) | 2309 | 1425 | 1.16 (1.01 - 1.33) |       |
| Q1 (lowest)            | 5509  | 3338  | 1.47 (1.37 - 1.58) | 3758 | 2255 | 1.18 (1.02 - 1.38) |       |
| <hr/>                  |       |       |                    |      |      |                    |       |
| <b>&gt;75 y</b>        |       |       |                    |      |      |                    |       |
| <b>Marital status</b>  |       |       |                    |      |      |                    |       |
| Married/<br>cohabiting | 11655 | 7560  | 1.00               | 2513 | 1551 | 1.00               | 0.56  |
| Not married            | 892   | 579   | 1.04 (0.94 - 1.14) | 270  | 190  | 1.07 (0.91 - 1.27) |       |
| Divorced               | 1307  | 735   | 1.04 (0.96 - 1.14) | 734  | 412  | 0.99 (0.86 - 1.13) |       |
| Widowed                | 2426  | 1695  | 1.03 (0.97 - 1.10) | 3079 | 2033 | 0.95 (0.86 - 1.05) |       |
| <b>Education</b>       |       |       |                    |      |      |                    |       |
| >12 years              | 2155  | 1184  | 1.00               | 515  | 256  | 1.00               | 0.66  |
| 10-12 years            | 5308  | 3353  | 1.07 (1.00 - 1.14) | 1763 | 1017 | 1.11 (0.97 - 1.28) |       |
| <10 years              | 8817  | 6032  | 1.15 (1.08 - 1.23) | 4318 | 2913 | 1.20 (1.05 - 1.37) |       |
| <b>Income</b>          |       |       |                    |      |      |                    |       |

|             |      |      |                    |      |      |                    |      |
|-------------|------|------|--------------------|------|------|--------------------|------|
| Q5          | 1565 | 780  | 1.00               | 276  | 122  | 1.00               | 0.22 |
| Q4          | 2511 | 1314 | 1.02 (0.93 - 1.11) | 492  | 255  | 1.23 (0.99 - 1.53) |      |
| Q3          | 4237 | 2622 | 1.07 (0.99 - 1.16) | 937  | 510  | 1.25 (1.02 - 1.52) |      |
| Q2          | 4875 | 3612 | 1.14 (1.06 - 1.24) | 1428 | 957  | 1.45 (1.20 - 1.75) |      |
| Q1 (lowest) | 3092 | 2241 | 1.21 (1.10 - 1.34) | 3463 | 2342 | 1.54 (1.26 - 1.88) |      |

---

\*Hazard ratio (HR) adjusted for age, sex, year of surgery and social factors other than the variable under study.
